# Supplementary material
Source: ML conference proceedings conference paper supplement (https://openreview.net/forum?id=rqGNUIj5lq)

## Semantic Knowledge Graph Construction

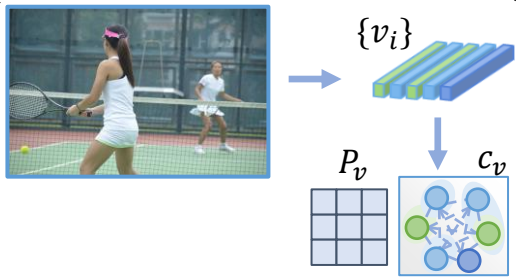

## Visual Knowledge Graph

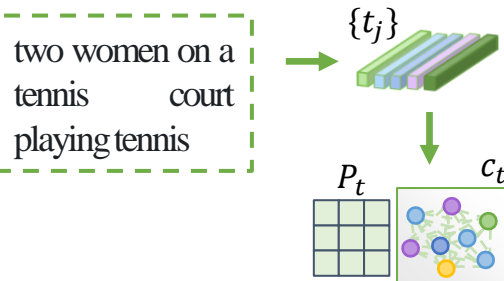

## Textual Knowledge Graph



## KGID

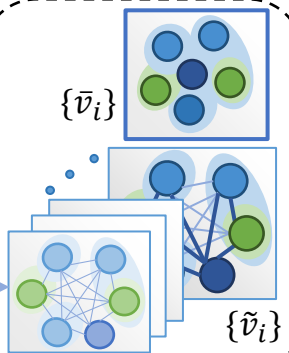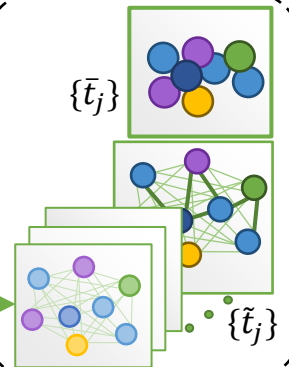

## Multi-Perspective Similarity Representation

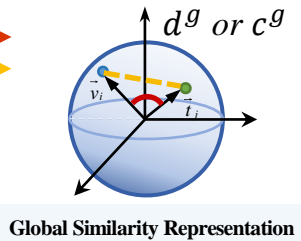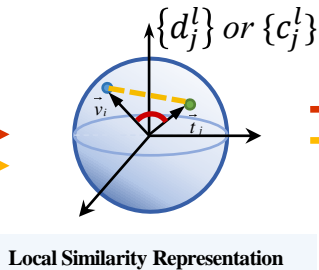

## Relational Graph Reconstruction

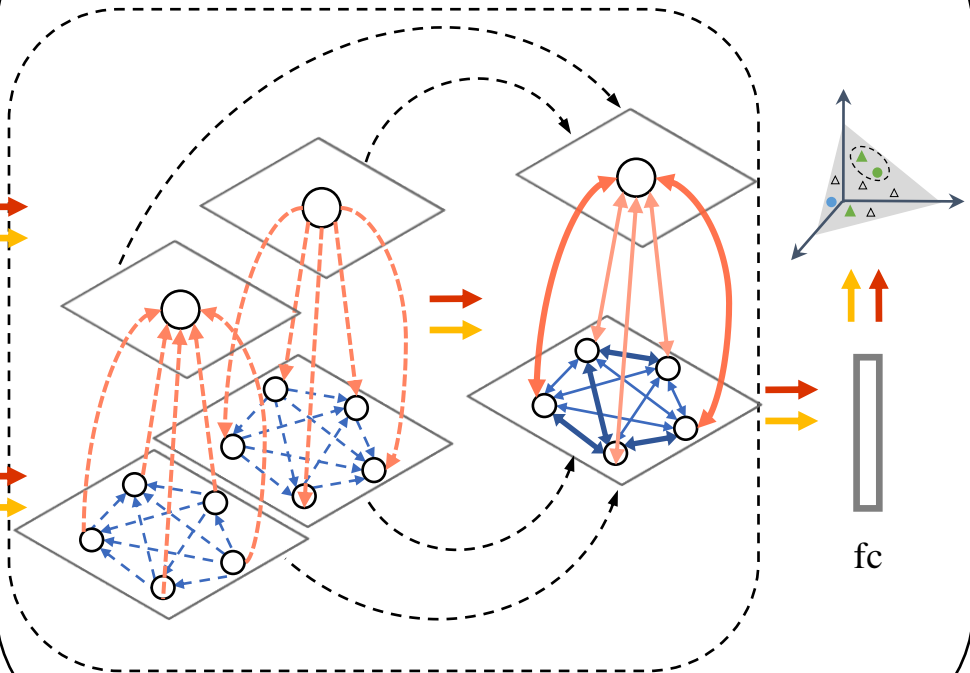

Supplement: supplementary_material [file attachment]
