# Supplementary material
Source: ML conference proceedings conference paper supplement (https://openreview.net/forum?id=rqGNUIj5lq)

Text Query1: Two people bicycle on a path separated by small mountains.

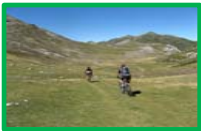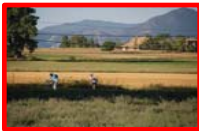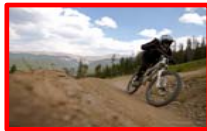

Text Query2: Two dogs are biting each other in the woods.

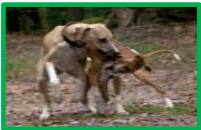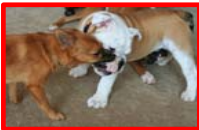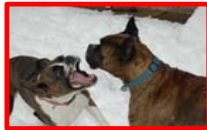

Supplement: supplementary_material [file attachment]
