# Supplementary material
Source: ML conference proceedings conference paper supplement (https://openreview.net/forum?id=rqGNUIj5lq)
Supplement: supplementary_material [file attachment]

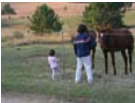

1. Two children are in a grassy area near two horses. ✓
2. 2 kids talk to the horses. ✓
3. Two children looking at horses through a small fence. ✓
4. Two children feeding horses through a fence. ✓
5. Two children pet horses in a field. ✓

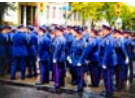

1. A group of men in blue uniforms are standing together. ✓
2. Men dressed up in blue uniforms standing in formation. ✓
3. Military men in blue and red suits stand in the street. ✓
4. A crowd of guards standing on a sidewalk. ✓
5. Men in uniform are standing on a street. ✗
