# Supplementary material
Source: ML conference proceedings conference paper supplement (https://openreview.net/forum?id=rqGNUIj5lq)

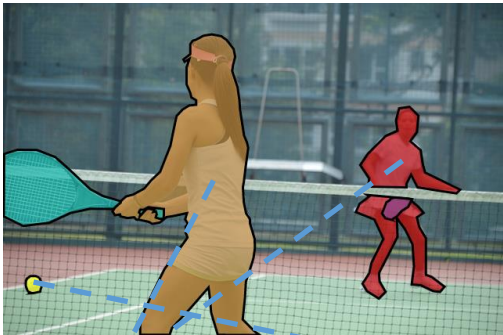

two women on a tennis court playing tennis

Supplement: supplementary_material [file attachment]

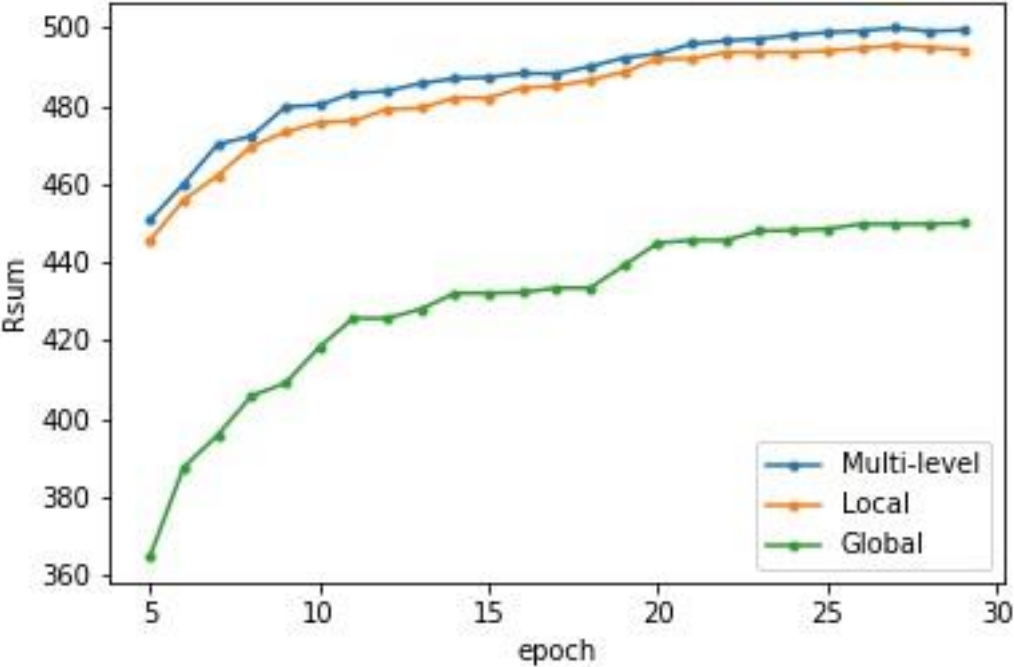

Supplement: supplementary_material [file attachment]

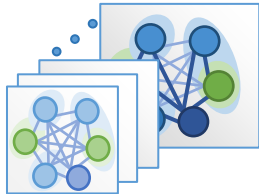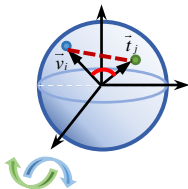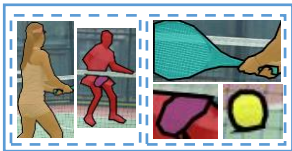

two women on a tennis  
court playing tennis

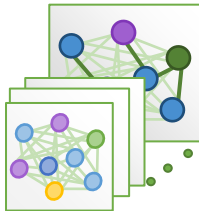

Supplement: supplementary_material [file attachment]

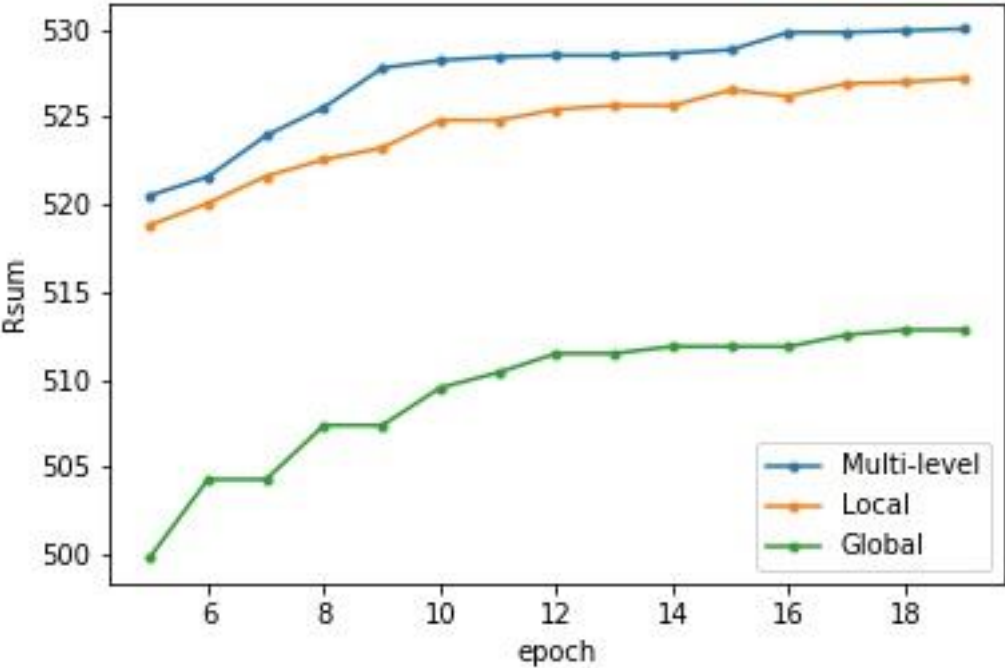

Supplement: supplementary_material [file attachment]
